# Supplementary material for: Integration with MoO3 microrods as precursors for hierarchical polyaniline microtubes and composites for anionic dye removal in water treatment
Source: Royal Society of Chemistry journal article supplement (doi:10.1039/d1nj02439f), 2021-01-01
Supplement: d1nj02439f1.pdf [file d1nj02439f1.pdf]

## **Integrated with MoO<sub>3</sub> microrods as precursors to hierarchical polyaniline microtubes and composites for anionic dye removal in water treatment**

Yaoyao Weng<sup>a</sup>, Jing Zheng<sup>b</sup>, Min Zhang<sup>\*b</sup>

<sup>a</sup>Zhejiang Industry Polytechnic College, Shaoxing, 312000, PR China

<sup>b</sup>College of Chemistry and Chemical Engineering, Shanghai University of Engineering Science, Shanghai 201620, PR China. E-mail: zhangmin@sues.edu.cn

### ***Preparation of PANI@Fe<sub>3</sub>O<sub>4</sub> microtubes***

100 mg of PANI nanotubes and 150 mg of the iron precursor Fe(acac)<sub>3</sub> were immersed into 60 mL triethylene glycol by sonication for 15 minutes. Afterwards, the mixture was heated to 278°C and stirred vigorously under N<sub>2</sub> protection and kept refluxing at 278°C for 30 min. After being cooled to room temperature, the resulting composites were collected with a magnet and washed with deionized water and ethanol for several times to remove impurities. Finally the products were dried in a vacuum at 50°C for 24 h.

### ***Preparation of PANI@MnO<sub>2</sub> microtubes***

In a typical procedure, 40 mg of the as-synthesized PANI nanotubes were dispersed in 20 mL of distilled water. Then 20 mL of 0.015 M KMnO<sub>4</sub> aqueous solution was added into the above suspension under stirring for 20 min. After that, the mixed solution was transferred to a 30 mL Teflon-lined stainless steel autoclave. The autoclave was sealed and put in an electric oven at 120 °C for 2 h. The resulting product was isolated from the suspension by centrifugation at 6000 rpm and washed three times with deionized water. And finally the composites were placed in a vacuum under 50°C for

24 h.

### *Preparation of NCMTs@Ni microtubes*

100 mg of the as-synthesized PANI nanotubes were dispersed in 20 mL of  $\text{NiCl}_2 \cdot 6\text{H}_2\text{O}$  (20mg/mL). The resulting product was isolated from the suspension by centrifugation at 6000 rpm and washed three times with deionized water. It was carbonized under  $\text{N}_2$  atmosphere at 500 °C for 5 h to get the NCMTs@Ni nanotubes.

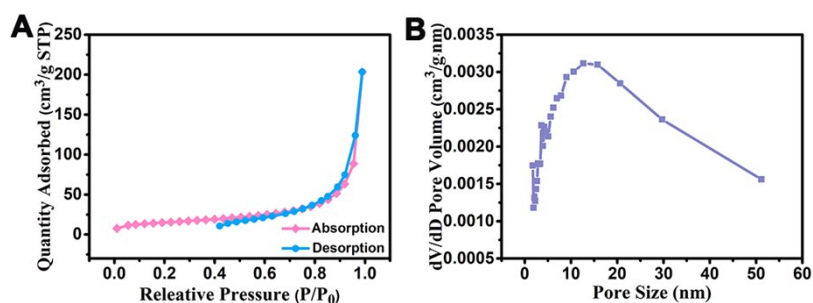

Fig. S1. Adsorption–desorption isotherms of  $\text{N}_2$  on PANI microtubes determined at 77.35 K(A), pore size distribution calculated from the adsorption data by the BJH method(B)

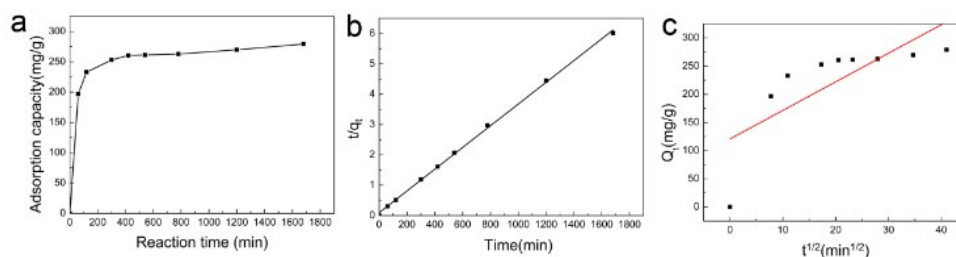

Fig. S2 (a) Effect of contact time on the adsorption of CR on PANI hollow microtubes and the pseudo-second-order kinetics plots(b), and Intra-particle diffusion model(c) of CR adsorption on PANI hollow microtubes.

Table S1 Kinetics parameters for the adsorption of CR on the PANI hollow microtubes.

| Models                  |       | PANI microtubes |
|-------------------------|-------|-----------------|
| Pseudo-second order     | $K_2$ | 0.00014         |
|                         | $Q_e$ | 279.32          |
|                         | $R^2$ | 0.9989          |
| Intraparticle diffusion | $K_3$ | 5.07            |
|                         | C     | 120.67          |
|                         | $R^2$ | 0.51            |

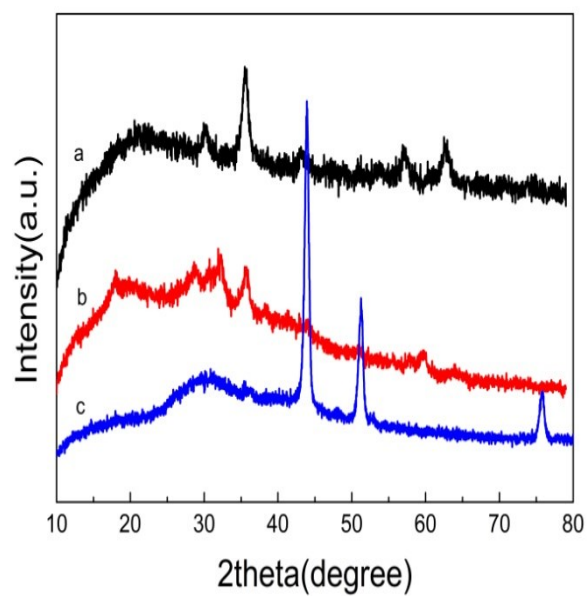

Fig.S3 X-Ray diffraction patterns of PANI/Fe<sub>3</sub>O<sub>4</sub>(a), PANI/MnO<sub>2</sub>(b) and NCMTs/Ni(c)
